# Supplementary material for: Controlled thiol–ene post-polymerization reactions on polyferrocenylsilane homopolymers and block copolymers
Source: Royal Society of Chemistry journal article supplement (doi:10.1039/c3py21129k), 2013-01-01
Supplement: c3py21129k.pdf [file c3py21129k.pdf]

Electronic Supplementary Information (ESI)

## Controlled thiol-ene post-polymerization reactions on polyferrocenylsilane homopolymers and block copolymers

Laurent Chabanne, Stefan Pfirrmann, David J. Lunn, and Ian Manners\*

$^1\text{H}$  NMR ( $\text{C}_6\text{D}_6$ ) for polymer **1**

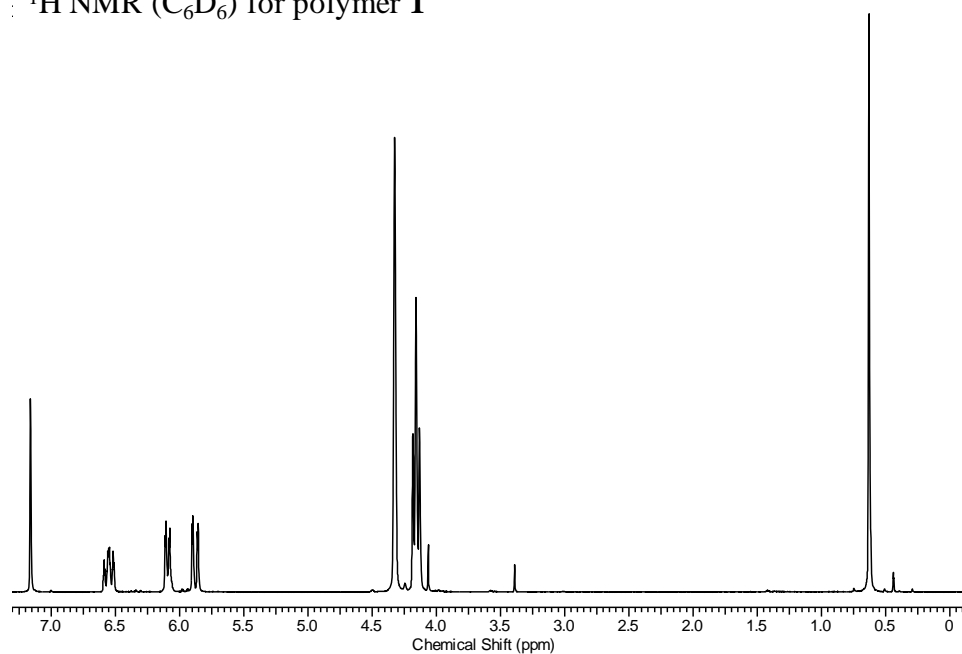

$^{13}\text{C}$  NMR ( $\text{C}_6\text{D}_6$ ) for polymer **1**

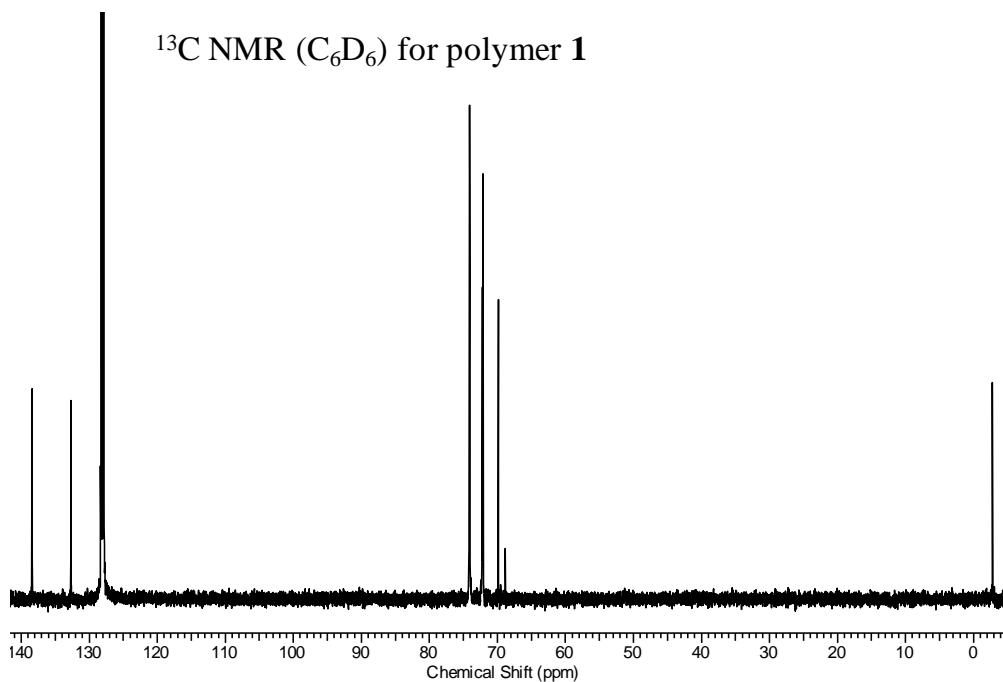

$^1\text{H}$  NMR ( $\text{C}_6\text{D}_6$ ) for polymer **2a**

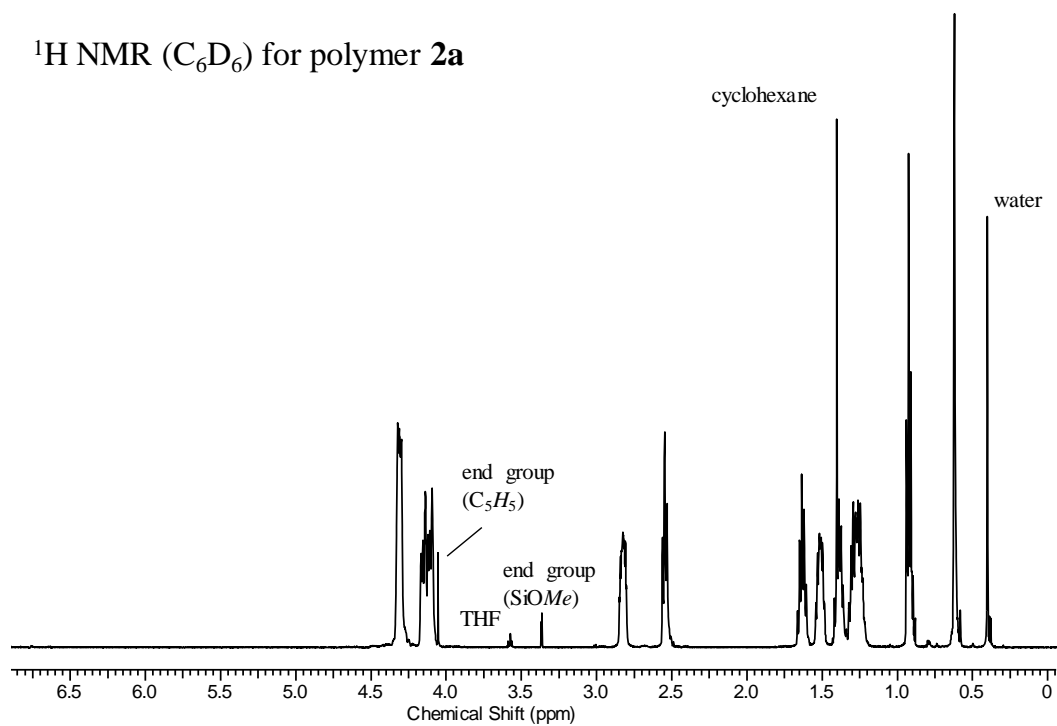

$^{13}\text{C}$  NMR ( $\text{C}_6\text{D}_6$ ) for polymer **2a**

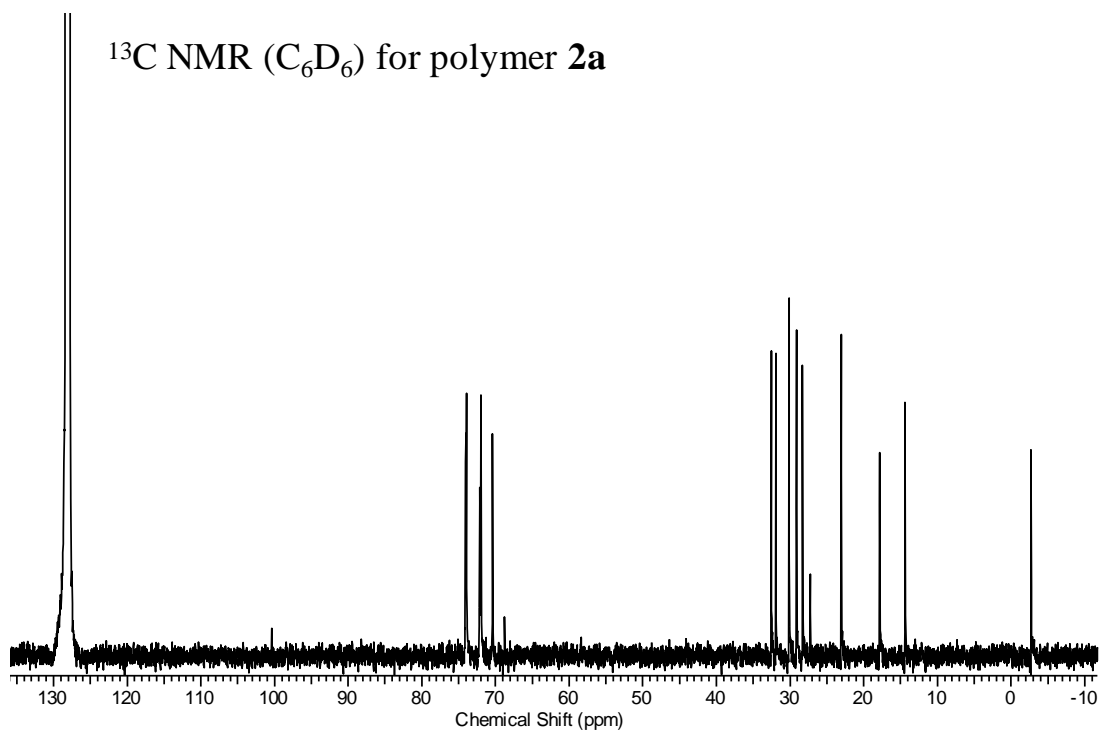

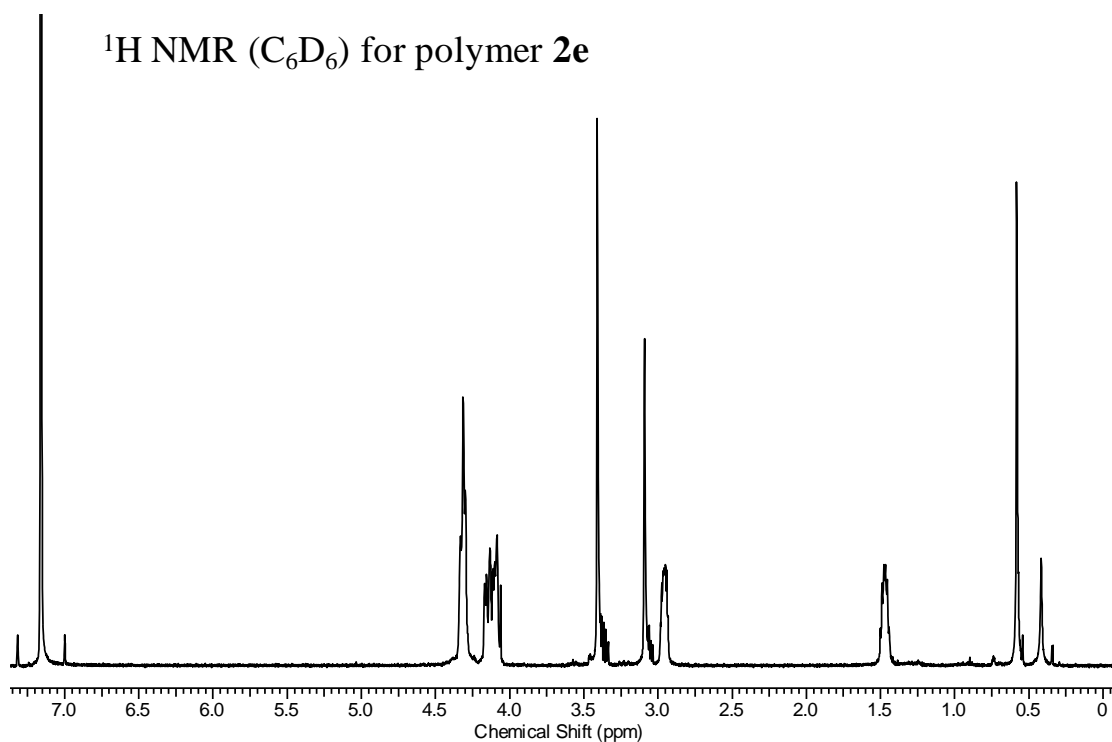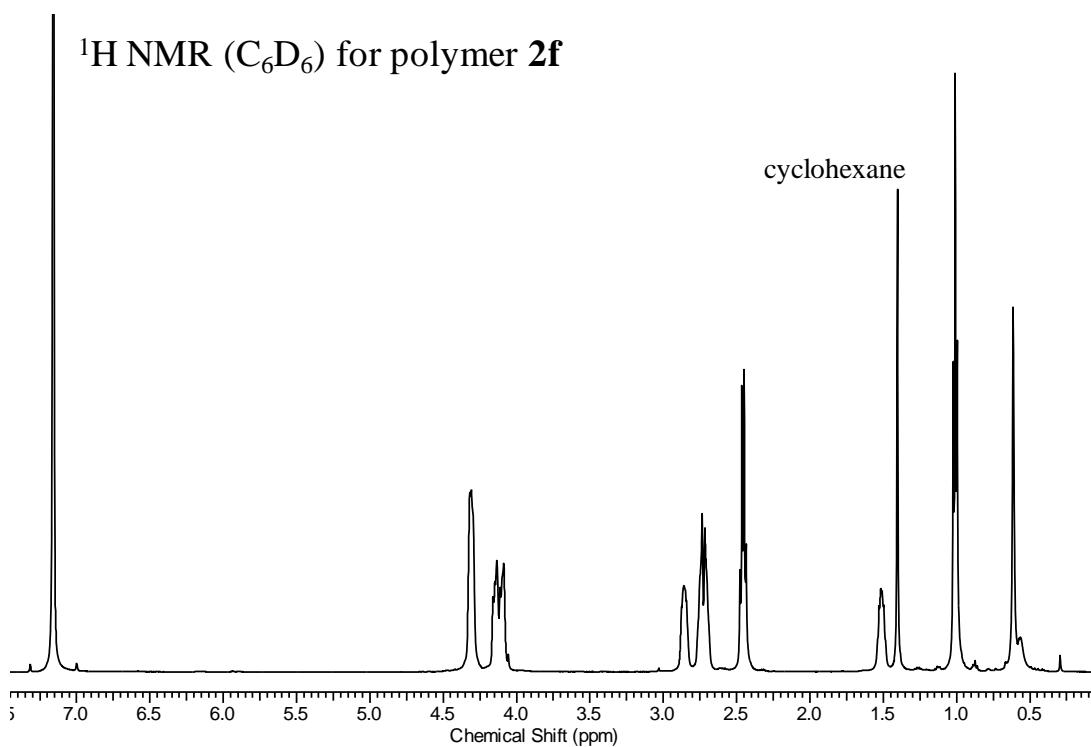

**Figure S1.** Representative NMR spectra for various homopolymers

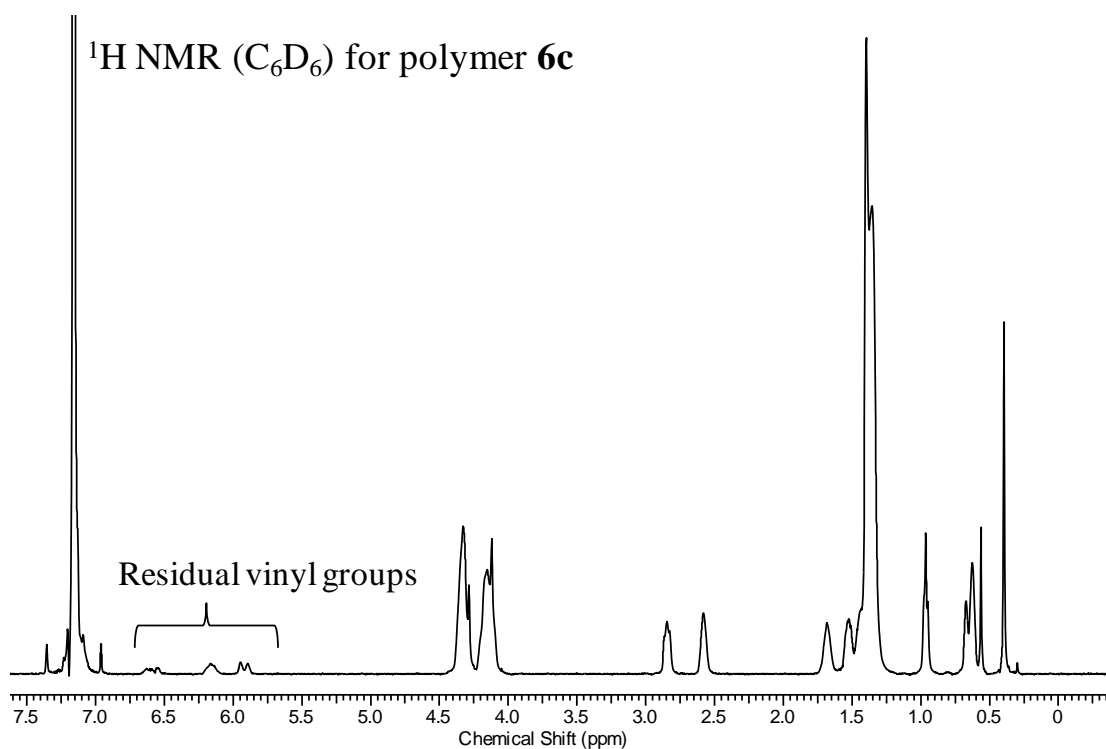

**Figure S2.** <sup>1</sup>H NMR spectrum for diblock copolymer **6c** with residual vinyl groups

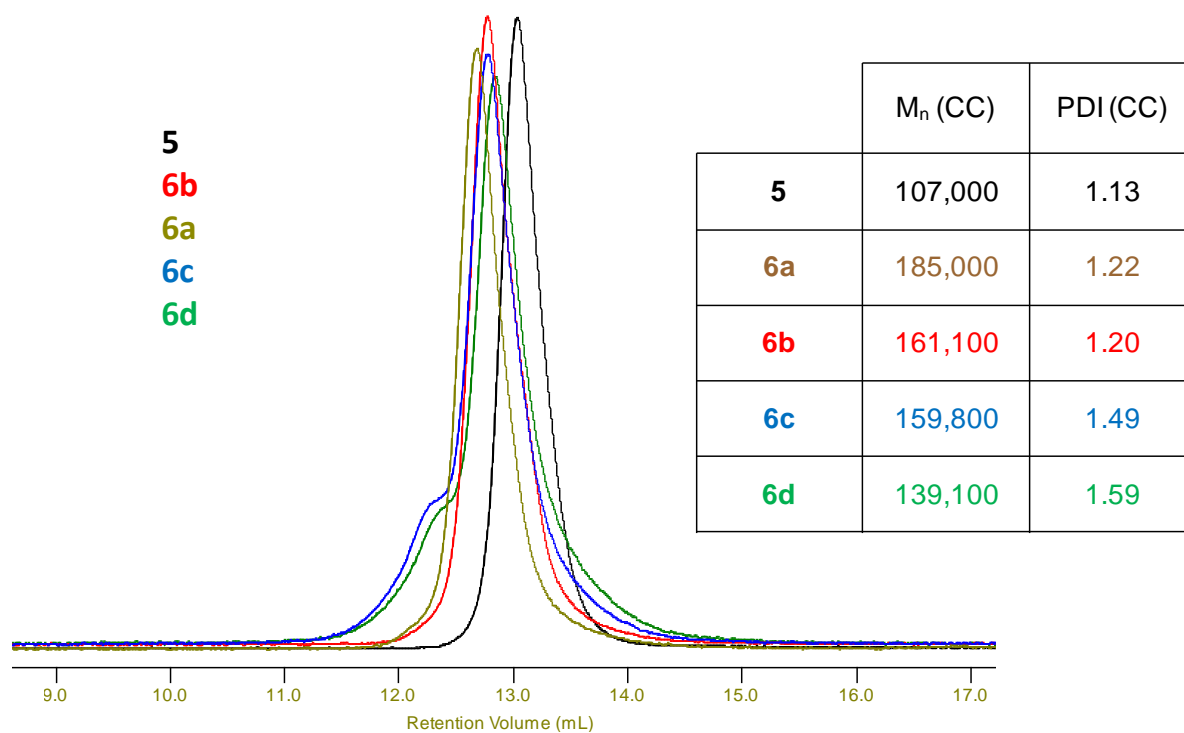

**Figure S3.** GPC traces of precursor **5** and hydrothiolated diblock copolymers **6a-d**.

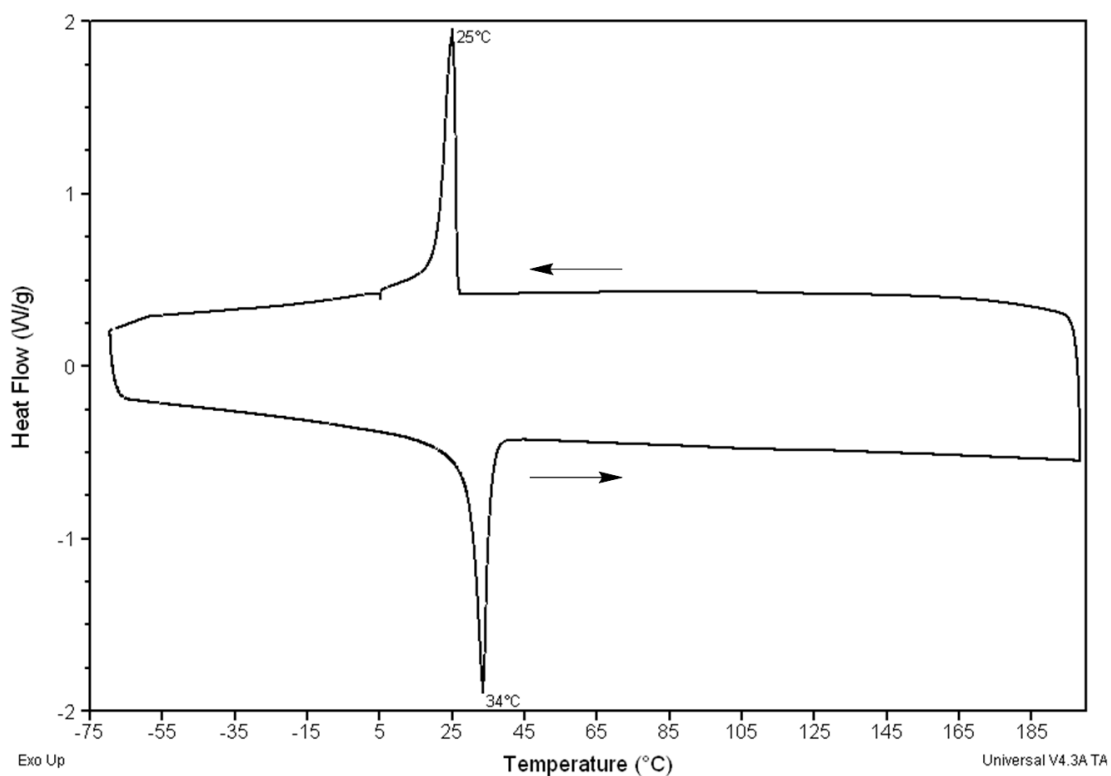

**Figure S4.** DSC of diblock copolymer **6a** at a scan rate of 10 °C/min.

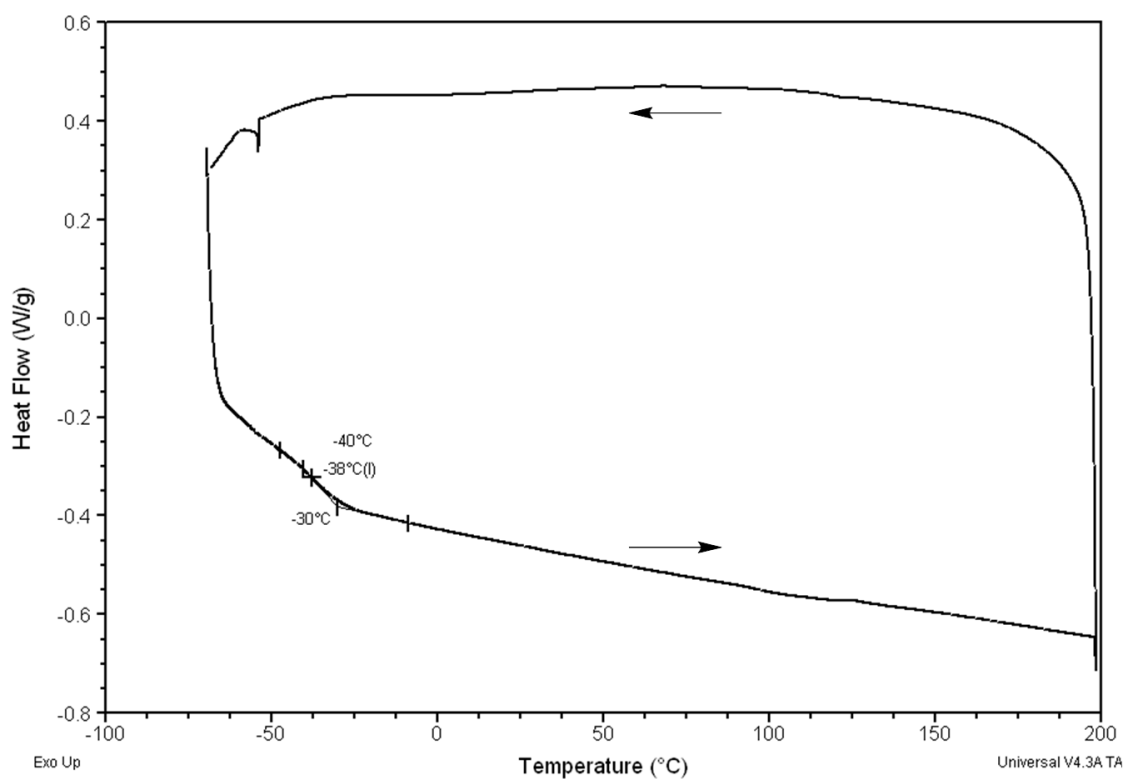

**Figure S5.** DSC of diblock copolymer **6b** at a scan rate of 10 °C/min.
